# Supplementary material for: Polyoxometalate-ionic liquids (POM-ILs) – a new type of ionic liquid additive family for lubricants
Source: Royal Society of Chemistry journal article supplement (doi:10.1039/d4ra07526a), 2025-01-01
Supplement: d4ra07526a9.pdf [file d4ra07526a9.pdf]

## Supplementary information

### **Polyoxometalate-Ionic Liquids (POM-ILs) - a new type of ionic liquids for lubricants**

M. L. Casasin-Garcia<sup>1</sup>, H. Khanmohammadi<sup>1</sup>, S. G. Mitchell<sup>2</sup>, N. Espallargas<sup>1</sup>

<sup>1</sup> Norwegian Tribology Center, Department of Mechanical and Industrial Engineering, Norwegian University of Science and Technology (NTNU), Trondheim, Norway.

<sup>2</sup> Instituto de Nanociencia y Materiales de Aragón (INMA-CSIC/UNIZAR), Consejo Superior de Investigaciones Científicas, Universidad de Zaragoza, Zaragoza, Spain.

## Supplementary information

### 1- Friction evolution of the different lubricant blends

#### 1.1 - DPG

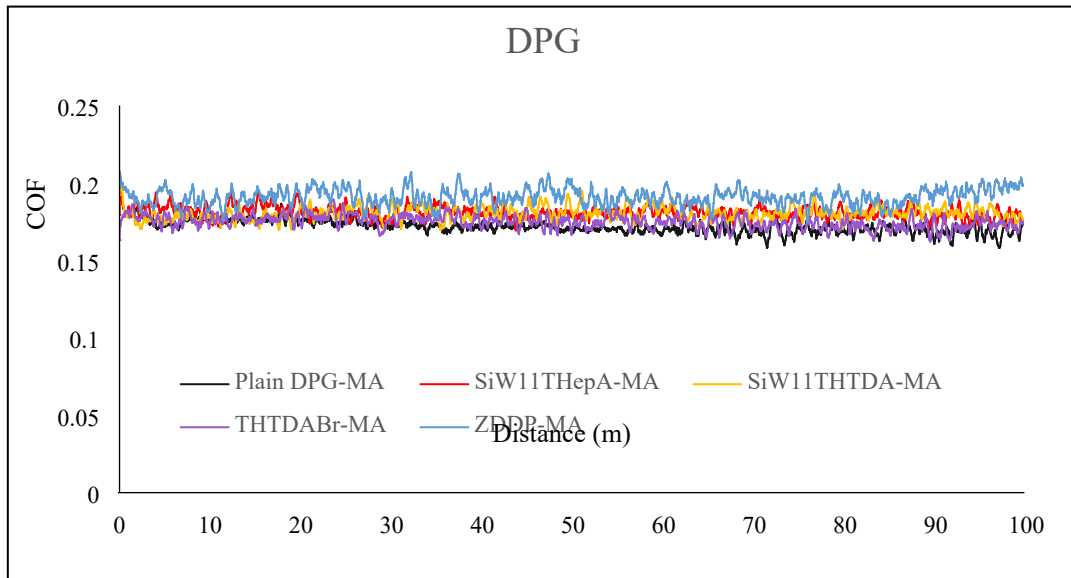

**Figure S1.** Friction evolution behaviour of different additives in DPG as well as plain DPG.

#### 1.2 - DEG

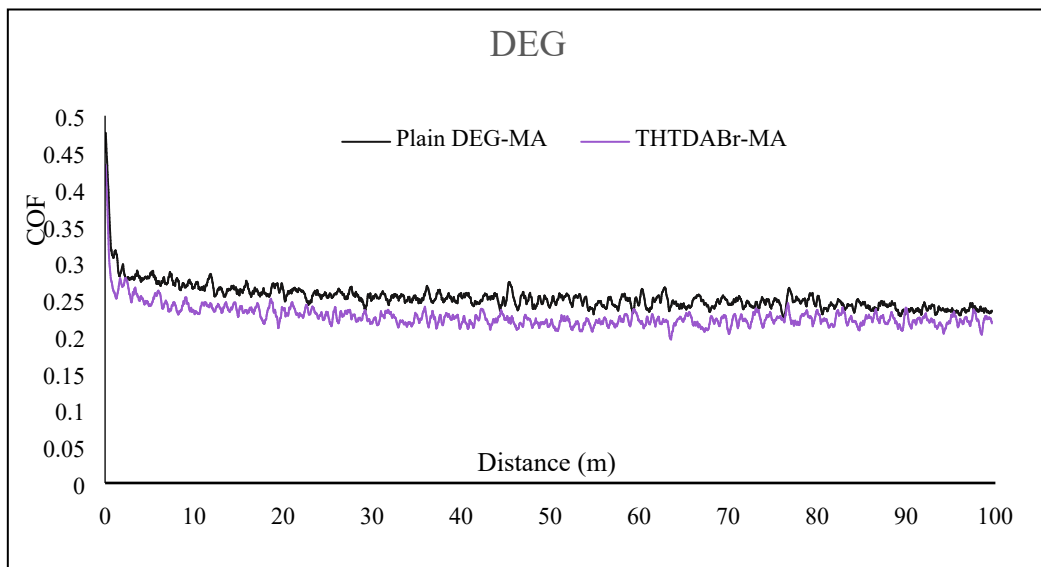

**Figure S2.** Friction evolution behaviour of different additives in DEG as well as plain DEG.

## Supplementary information

### 1.3 - DhL 4016

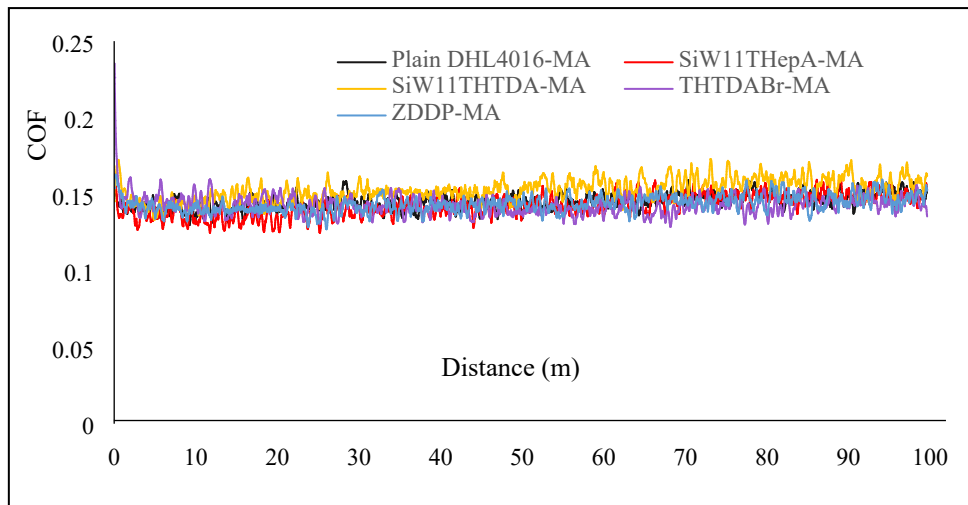

**Figure S3.** Friction evolution behaviour of different additives in DhL 4016 as well as plain DhL 4016.

### 1.4 - DhL 4018

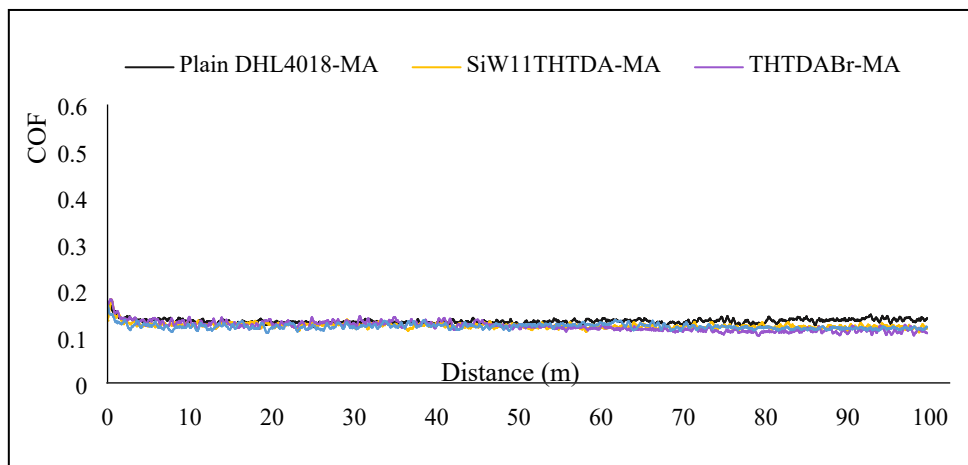

**Figure S4.** Friction evolution behaviour of different additives in DhL 4018 as well as plain DhL 4018.

### 1.5 - PAO 8

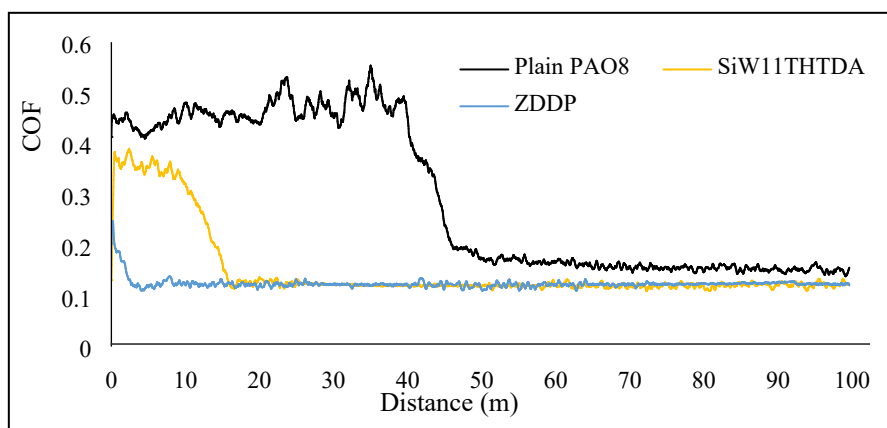

**Figure S5.** Friction evolution behaviour of different additives in PAO 8 as well as plain PAO 8.

# Supplementary information

## 2- Top view SEM images the different blends tested on AISI 316L

**Table S1.** SEM images of the wear track surface on the AISI 316L stainless steel discs for all the different lubricant blends tested at both 100 and 500 magnification.

| Lubricant blend   | x100                                                                                | x500                                                                                 |
|-------------------|-------------------------------------------------------------------------------------|--------------------------------------------------------------------------------------|
| SiW11THTDA in DPG | 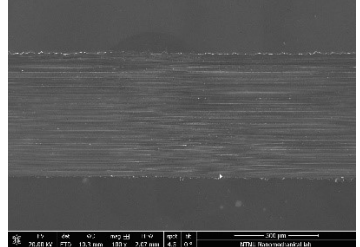   |    |
| SiW11ThepA in DPG |    |    |
| THTDABr in DPG    |   |   |
| ZDDP in DPG       |  |  |
| Plain DPG         |  |  |
| THTDABr in DEG    |  |  |

# Supplementary information

|                       |                                                                                     |                                                                                      |
|-----------------------|-------------------------------------------------------------------------------------|--------------------------------------------------------------------------------------|
| Plain DEG             | 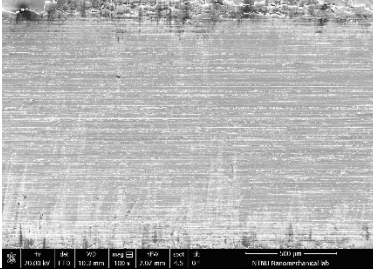   |    |
| SiW11THTDA in DhL4016 |    |    |
| SiW11ThepA in DhL4016 |   |   |
| THTDABr in DhL4016    |  |  |
| ZDDP in DhL4016       |  |  |
| Plain DhL4016         |  |  |

## Supplementary information

|                                  |  |  |
|----------------------------------|--|--|
| <p>SiW11THTDA in<br/>DhL4018</p> |  |  |
| <p>THTDABr in<br/>DhL4018</p>    |  |  |
| <p>ZDDP in DhL4018</p>           |  |  |
| <p>Plain DhL4018</p>             |  |  |
| <p>SiW11THTDA in<br/>PAO8</p>    |  |  |
| <p>ZDDP in PAO8</p>              |  |  |

## Supplementary information

Plain PAO8

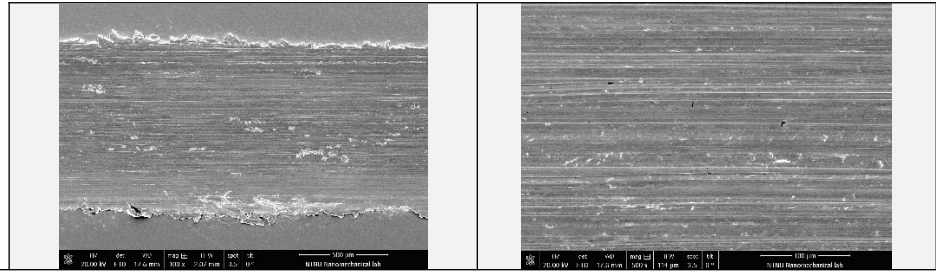

## Supplementary information

### All EDS mapping

#### 1- SiW11THTDA at 1% in PAO8

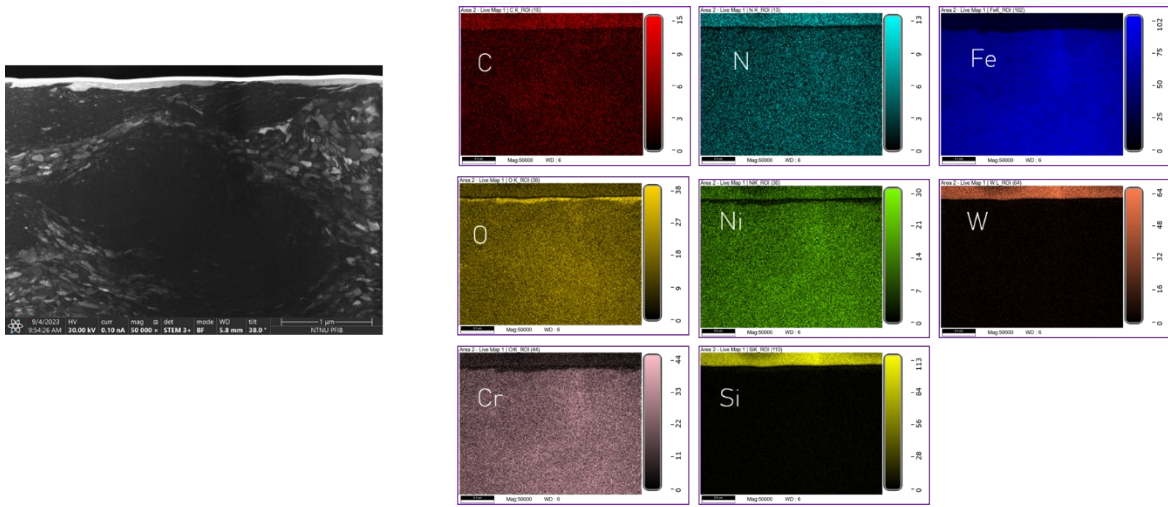

Figure S6. EDS mapping for different elements.

#### 2- ZDDP at 1% in PAO8

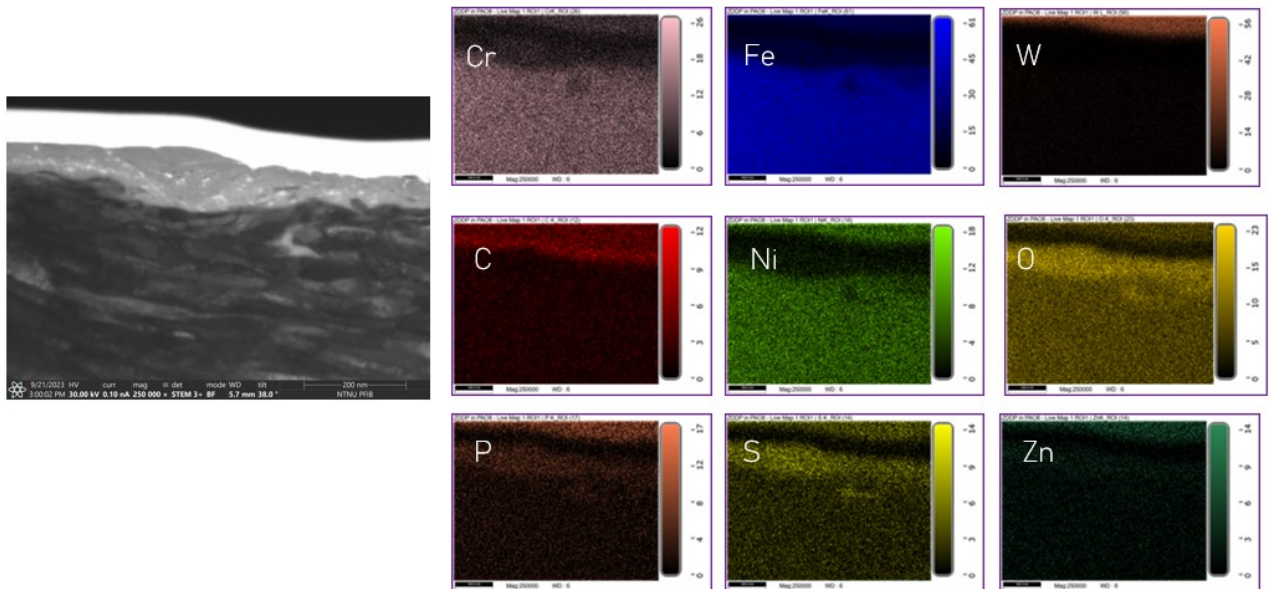

Figure S7. EDS mapping for different elements.



## Supplementary information

TGA:

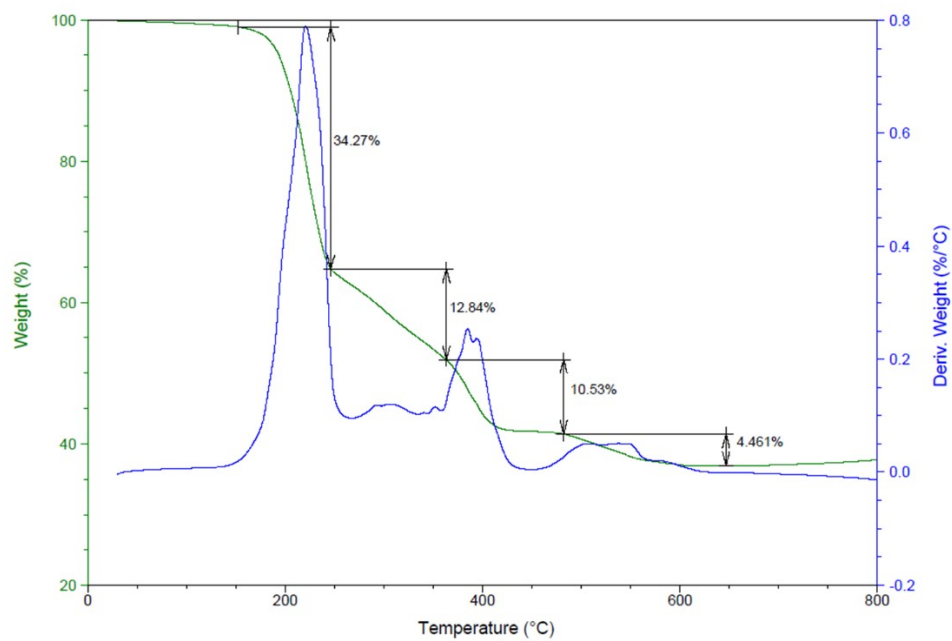

Figure S8. TGA analysis of SiW<sub>11</sub>THTDA
