# Supplementary figures and images for: Polyoxometalate-ionic liquids (POM-ILs) – a new type of ionic liquid additive family for lubricants
Source: Royal Society of Chemistry journal article supplement (doi:10.1039/d4ra07526a), 2025-01-01

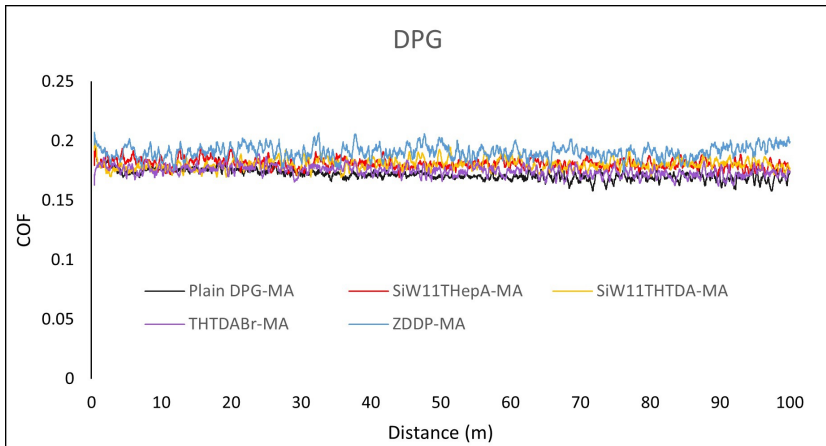

Supplement: d4ra07526a1.pdf [file d4ra07526a1.pdf]

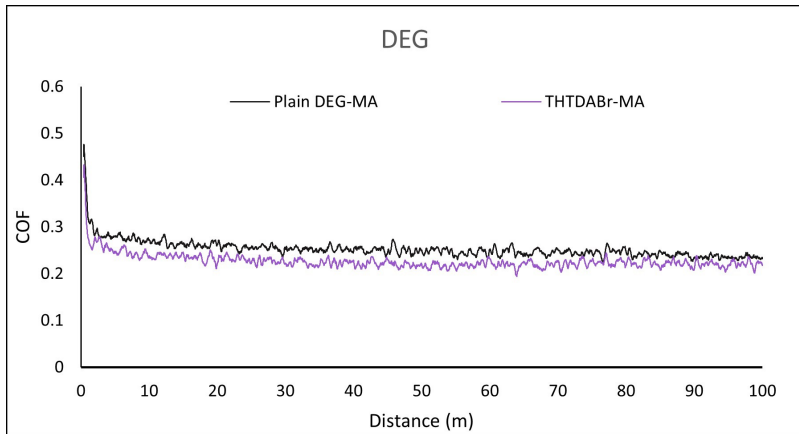

Supplement: d4ra07526a2.pdf [file d4ra07526a2.pdf]

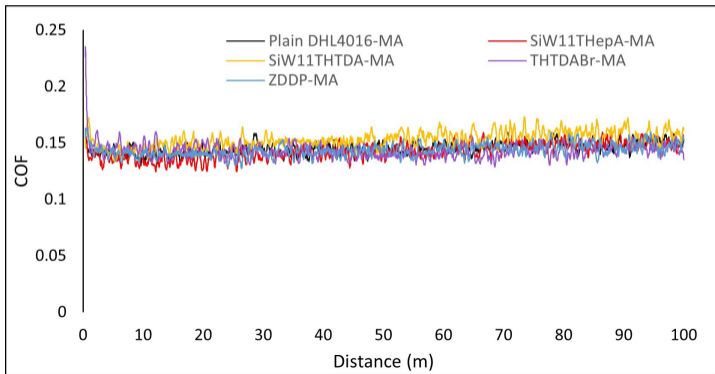

Supplement: d4ra07526a3.pdf [file d4ra07526a3.pdf]

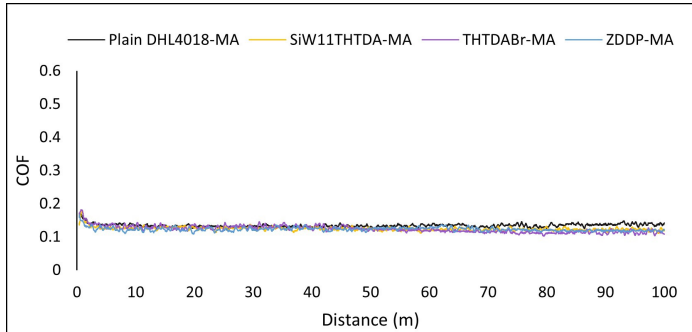

Supplement: d4ra07526a4.pdf [file d4ra07526a4.pdf]

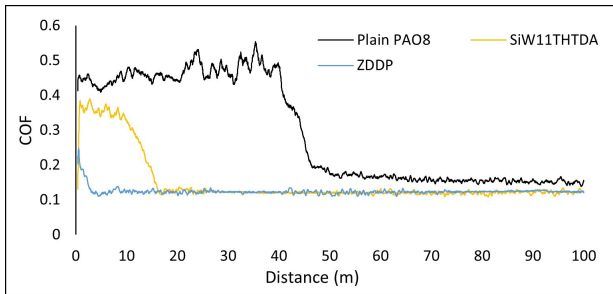

Supplement: d4ra07526a5.pdf [file d4ra07526a5.pdf]

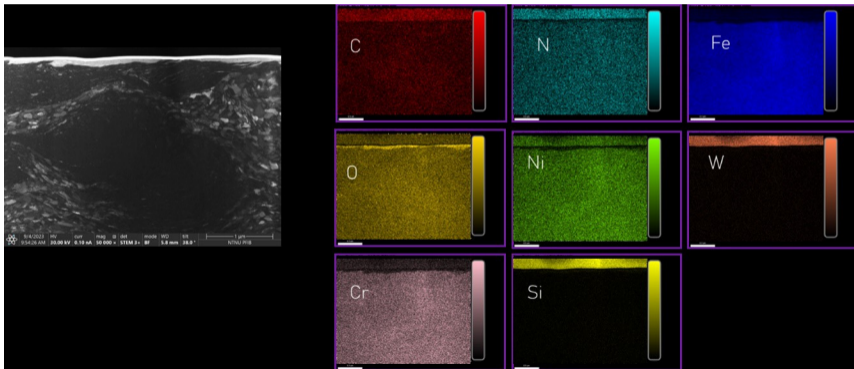

Supplement: d4ra07526a6.pdf [file d4ra07526a6.pdf]

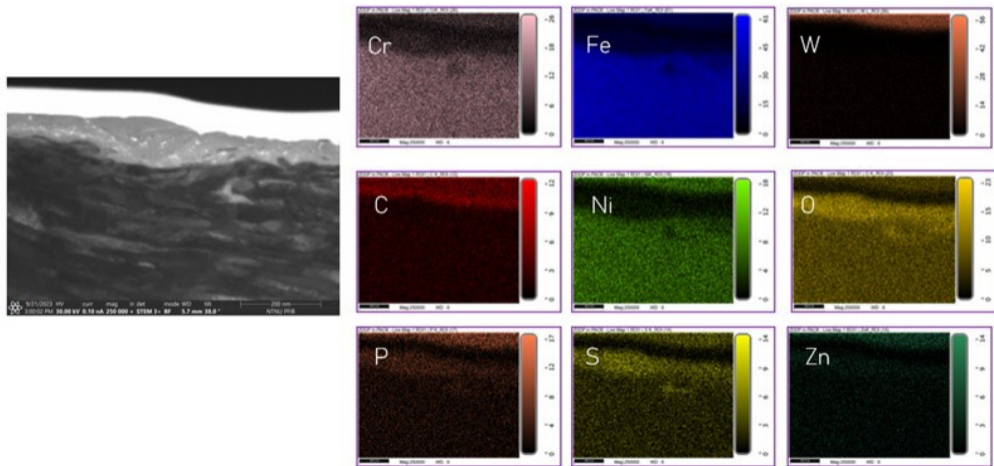

Supplement: d4ra07526a7.pdf [file d4ra07526a7.pdf]

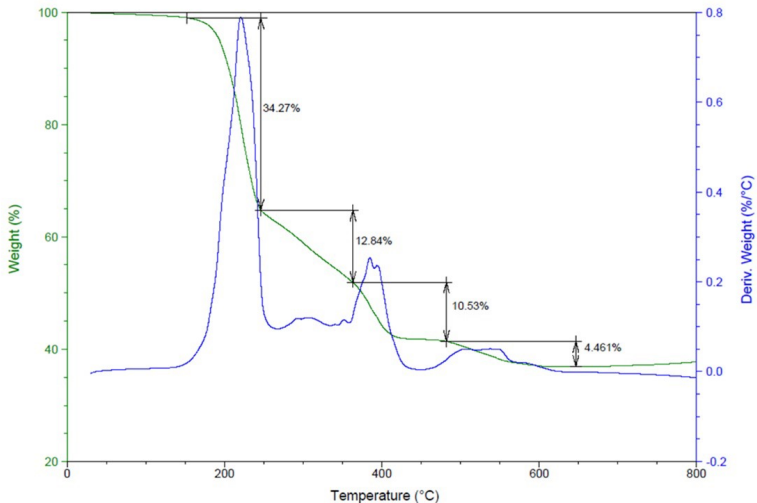

Supplement: d4ra07526a8.pdf [file d4ra07526a8.pdf]
